# Supplementary material for: Two luminescent Zn(ii) metal–organic frameworks for exceptionally selective detection of picric acid explosives
Source: Royal Society of Chemistry journal article supplement (doi:10.1039/c5cc00987a), 2015-01-01
Supplement: c5cc00987a1.pdf [file c5cc00987a1.pdf]

## *Supplementary Information*

# **Two Luminescent Zn(II) Metal–Organic Frameworks For Exceptionally Selective Detection of picric acid explosive**

**Zhi-Qiang Shi,<sup>ab</sup> Zi-Jian Guo<sup>a</sup> and He-Gen Zheng<sup>\*a</sup>**

*<sup>a</sup>State Key Laboratory of Coordination Chemistry, School of Chemistry and Chemical Engineering, Collaborative Innovation Center of Advanced Microstructures, Nanjing University, Nanjing 210093, P. R. China*

*<sup>b</sup>College of Chemistry and Chemical Engineering, Taishan University, Taian 271021, P. R. China*

### **S1. Materials and general methods**

All the chemicals and solvents purchased commercially and used without further purification. <sup>1</sup>H NMR spectra was measured on Bruker Avance 500 MHz with tetramethylsilane as the internal standard. Elemental analyses (C, H and N) were performed on a Perkin Elmer 240C elemental analyzer. IR (KBr pellet) spectra were recorded in the range of 4000–400 cm<sup>-1</sup> on a Nicolet Impact 410 spectrometer using KBr pellets. Powder X-ray diffraction (PXRD) patterns were measured on a Bruker D8 Advance X-ray diffractometer using Cu-K $\alpha$  radiation ( $\lambda$  = 1.5406 Å) at room temperature. Thermogravimetric analyses (TGA) were performed under nitrogen condition with a heating rate of 10 °C·min<sup>-1</sup> using a Perkin Elmer thermogravimetric analyzer. Fluorescence spectra for the compounds were conducted with a SHIMAZU VF-320 X-ray fluorescence spectrophotometer at room temperature. UV-vis spectra were collected at room temperature using a Shimadzu UV-3600 double monochromator spectrophotometer.

## S2. Photoluminescent sensing experiments

Finely ground sample of **MOF-1** or **MOF-2** (1 mg) was immersed in 2 mL corresponding pure organic solvents, respectively, treated by ultrasonication for 2 h, and then aged for 3 days to form stable suspensions before the fluorescence study. In the following nitro compounds sensing experiments, finely ground sample of **MOF-1** or **MOF-2** (1 mg) was immersed in 2 mL DMA to form stable suspension. The fluorescence was measured in-situ after incremental addition of freshly prepared analyte solutions (5 mM). The suspension was stirred at constant rate during experiment to maintain homogeneity.

## S3. Synthesis of H<sub>2</sub>L

**The first step:** A mixture of 2,5-dibromothiophene (2.42 g, 10 mmol), 3-ethoxycarbonylphenylboronic acid (5.82 g, 30 mmol), K<sub>3</sub>PO<sub>4</sub> (12.74 g, 60 mmol), and Pd(PPh<sub>3</sub>)<sub>4</sub> (1.16 g, 1 mmol) in dry 1,4-dioxane (200 mL) was heated to 100 °C for 3 days under N<sub>2</sub> atmosphere. After cooling to room temperature, solvent was removed by distillation under a vacuum. To the residue were added H<sub>2</sub>O and CHCl<sub>3</sub>, and the organic layer was extracted with CHCl<sub>3</sub> (200 mL × 3). The organic layer was dried by anhydrous MgSO<sub>4</sub> and filtered. Then the desired ester was separated by silica gel column chromatography (petroleum ether/dichloromethane = 2:1, v/v) to afford yellow powder in a yield 2.74 g (72%).

**The second step:** A mixture of the yellow carboxylic ester (1.91 g, 5 mmol), NaOH (3 g, 75 mmol), THF (50 mL), MeOH (50 mL) and H<sub>2</sub>O (25 mL) was refluxed for 48 h. After cooling to room temperature, THF and MeOH were evaporated. Then the mixture was acidified with diluted HCl (1.0 mol·L<sup>-1</sup>) until no further precipitate was detected (pH ≈ 2-3). The yellow solid 3,3'-(thiophene-2,5-diyl)dibenzoic acid (H<sub>2</sub>L) was collected by filtration in 87% yield after washing with water and drying in vacuum (1.41 g). <sup>1</sup>HNMR(500 MHz, DMSO): δ: 13.12 (s, 2H), 8.24 (s, 2H), 8.01 (d, 2H), 7.87 (d, 2H), 7.66 (s, 2H), 7.59 (t, 2H). IR(KBr, cm<sup>-1</sup>): 3408(w), 1684(vs), 1602(w), 1581(m), 1448(m), 1418(m), 1308(s), 1260(m), 901(w), 786(w), 753(m), 708(w), 554(w). Anal. calcd for C<sub>18</sub>H<sub>12</sub>O<sub>4</sub>S: C, 66.65%; H, 3.73%. Found: C, 66.58%; H, 3.79%; S, 9.97%.

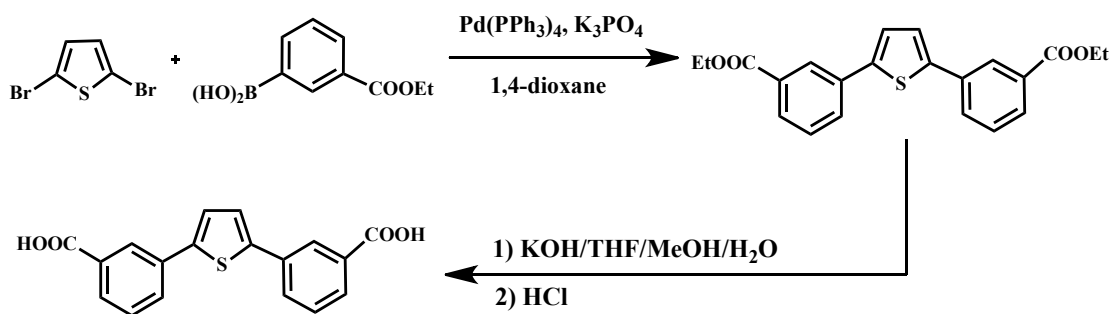

**Scheme S1.** Two-step synthesis route of  $H_2L$ .

#### S4. Synthesis of $[Zn_2(L)_2(dpyb)]$ (MOF-1) and $[Zn(L)(dipb)] \cdot 2H_2O$ (MOF-2)

A mixture of  $Zn(NO_3)_2 \cdot 6H_2O$  (14.9 mg, 0.05 mmol),  $H_2L$  (16.2 mg, 0.05 mmol), dpyb (5.8 mg, 0.025 mmol) was dissolved in 5ml of DMA/ $H_2O$  (2:3, v/v). The final mixture was transferred to a Parr Teflon-lined stainless steel vessel (15 mL) under autogenous pressure and heated at 85 °C for 3 days. Yellow block crystals of **MOF-1** were obtained. Yield: 45% (based on Zn). Anal. calcd for  $C_{26}H_{15}NO_4SZn$ : C, 62.10%; H, 3.01%; N, 2.79%. Found: C, 62.05%; H, 3.06%; N, 2.85%. IR(KBr,  $cm^{-1}$ ): 3412(w), 1634(vs), 1611(s), 1574(m), 1518(m), 1486(w), 1424(m), 1396(vs), 1221(w), 1074(w), 810(w), 764(m), 726(w), 4620(w). Light yellow block crystals of **MOF-2** were synthesized in the same condition except that dipb was added instead of dpyb. Yield: 38% (based on Zn). Anal. calcd for  $C_{36}H_{28}N_4O_6SZn$ : C, 60.89%; H, 3.97%; N, 7.89%. Found: C, 60.85%; H, 4.01%; N, 7.94%. IR(KBr,  $cm^{-1}$ ): 3411(w), 1620(s), 1571(m), 1518(s), 1378(vs), 1308(m), 1264(m), 1126(w), 1066(m), 964(w), 817(m), 769(m), 687(w), 514(w).

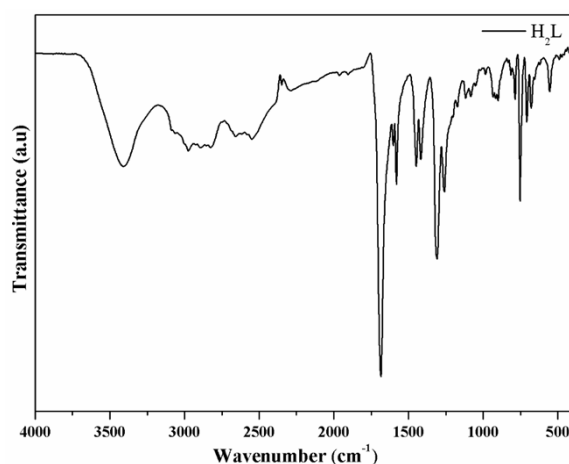

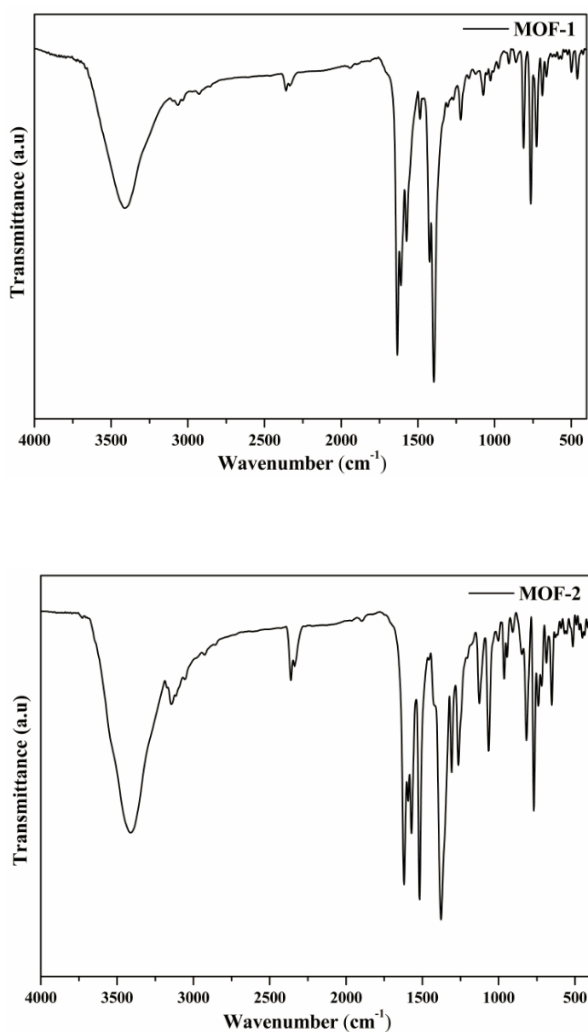

**Fig. S1** IR spectra of H<sub>2</sub>L, **MOF-1** and **MOF-2**.

## **S5. Single-crystal X-ray diffraction**

Single crystal X-ray diffraction data for **MOF-1** and **MOF-2** were collected on a Bruker Smart Apex II CCD diffractometer using Mo K $\alpha$  radiation ( $\lambda = 0.71073$  Å). A semiempirical absorption correction was applied using SADABS program.<sup>1</sup> The structures were solved by direct methods and all non-hydrogen atoms were located from the trial structures and then refined anisotropically on  $F^2$  refined by full-matrix least-squares procedures technique using the SHELXTL<sup>1</sup> crystallographic software package. The organic hydrogen atoms were generated geometrically. Guest solvent water molecules in the crystal of **MOF-2** were chemically featureless to refine using conventional discrete-atom models. Therefore the SQUEEZE program implemented in PLATON<sup>2</sup> was used to remove these electron densities. The detailed crystallographic data and structure refinement parameters are listed in Table S1. The selected bond lengths are given in Tables S2.

CCDC reference numbers of crystals **MOF-1** and **MOF-2** are 1035800 and 1035802, respectively.

Topological analyses were performed using the program package TOPOS.<sup>3</sup>

**Table S1.** Crystallographic Data and Structure Refinement Details for **MOF-1** and **MOF-2**.

| Compound                                                                                                       | <b>MOF-1</b>                                        | <b>MOF-2</b>                                                      |
|----------------------------------------------------------------------------------------------------------------|-----------------------------------------------------|-------------------------------------------------------------------|
| Formula                                                                                                        | C <sub>26</sub> H <sub>15</sub> NO <sub>4</sub> SZn | C <sub>36</sub> H <sub>28</sub> N <sub>4</sub> O <sub>6</sub> SZn |
| Formula weight                                                                                                 | 502.82                                              | 710.10                                                            |
| Crystal system                                                                                                 | Triclinic                                           | Orthorhombic                                                      |
| Space group                                                                                                    | <i>P</i> -1                                         | <i>Pbca</i>                                                       |
| <i>a</i> (Å)                                                                                                   | 7.9902(17)                                          | 18.3790(19)                                                       |
| <i>b</i> (Å)                                                                                                   | 11.043(2)                                           | 10.6606(11)                                                       |
| <i>c</i> (Å)                                                                                                   | 13.430(4)                                           | 31.736(3)                                                         |
| $\alpha$ (deg)                                                                                                 | 105.463(6)                                          | 90                                                                |
| $\beta$ (deg)                                                                                                  | 102.922(6)                                          | 90                                                                |
| $\gamma$ (deg)                                                                                                 | 107.508(4)                                          | 90                                                                |
| <i>V</i> (Å <sup>3</sup> )                                                                                     | 1028.0(4)                                           | 6218.1(11)                                                        |
| <i>Z</i>                                                                                                       | 2                                                   | 8                                                                 |
| <i>D</i> <sub>calcd</sub> (g cm <sup>-3</sup> )                                                                | 1.624                                               | 1.440                                                             |
| $\mu$ (Mo Ka)(mm <sup>-1</sup> )                                                                               | 1.333                                               | 0.904                                                             |
| <i>F</i> (000)                                                                                                 | 512                                                 | 2768                                                              |
| Temperature (K)                                                                                                | 296(2)                                              | 296(2)                                                            |
| $\theta$ min-max (deg)                                                                                         | 2.07, 25.05                                         | 1.28, 25.05                                                       |
| Tot., uniq. data                                                                                               | 5395, 3559                                          | 32754, 5488                                                       |
| <i>R</i> (int)                                                                                                 | 0.0312                                              | 0.0571                                                            |
| Observed data [ <i>I</i> > 2 $\sigma$ ( <i>I</i> )]                                                            | 2758                                                | 4350                                                              |
| <i>N</i> <sub>ref</sub> , <i>N</i> <sub>par</sub>                                                              | 3559, 298                                           | 5488, 415                                                         |
| <i>R</i> <sub>1</sub> <sup>a</sup> , <i>wR</i> <sub>2</sub> <sup>b</sup> ( <i>I</i> > 2 $\sigma$ ( <i>I</i> )) | 0.0446, 0.1089                                      | 0.0512, 0.1629                                                    |
| <i>R</i> <sub>1</sub> , <i>wR</i> <sub>2</sub> (all data)                                                      | 0.0668, 0.1249                                      | 0.0647, 0.1735                                                    |
| <i>S</i>                                                                                                       | 1.034                                               | 1.085                                                             |
| Min. and max resd dens (e <sup>-</sup> Å <sup>-3</sup> )                                                       | 0.5392, -0.546                                      | 0.951, -0.831                                                     |

<sup>a</sup>  $R_1 = \Sigma ||F_o| - |F_c|| / \Sigma |F_o|$ , <sup>b</sup>  $wR_2 = \Sigma [w(F_o^2 - F_c^2)^2] / \Sigma [w(F_o^2)^2]^{1/2}$ .

**Table S2.** Selected Bond Lengths (Å) and Angles (deg) for **MOF-1** and **MOF-2**.

| <b>MOF- 1</b>                                                                    |            |                     |            |
|----------------------------------------------------------------------------------|------------|---------------------|------------|
| Zn(1)-O(2)                                                                       | 2.034(3)   | Zn(1)-N(1)          | 2.061(3)   |
| Zn(1)-O(4)#1                                                                     | 2.038(3)   | Zn(1)-O(1)#2        | 2.063(3)   |
| Zn(1)-O(3)#3                                                                     | 2.057(3)   |                     |            |
| O(2)-Zn(1)-N(1)                                                                  | 101.19(13) | O(2)-Zn(1)-O(4)#1   | 88.39(14)  |
| O(4)#2-Zn(1)-N(1)                                                                | 104.31(13) | O(4)#1-Zn(1)-O(1)#2 | 89.95(14)  |
| O(4)#2-Zn(1)-O(3)#3                                                              | 158.78(12) | O(2)-Zn(1)-O(1)#2   | 159.06(12) |
| N(1)-Zn(1)-O(1)#2                                                                | 99.45(13)  | O(2)-Zn(1)-O(3)#3   | 86.31(13)  |
| O(3)#3-Zn(1)-N(1)                                                                | 96.88(13)  | O(3)#3-Zn(1)-O(1)#2 | 87.74(13)  |
| Symmetry codes: #1 = $x, y, -1+z$ ; #2 = $1-x, 1-y, -z$ ; #3 = $1-x, 1-y, 1-z$ . |            |                     |            |
| <b>MOF-2</b>                                                                     |            |                     |            |
| Zn(1)-O(1)                                                                       | 1.962(2)   | Zn(1)-N(1)          | 2.001(3)   |
| Zn(1)-N(3)#1                                                                     | 2.014(3)   | Zn(1)-O(3)#2        | 1.977(3)   |
| O(1)-Zn(1)-N(1)                                                                  | 111.04(12) | O(3)#2-Zn(1)-N(1)   | 106.39(12) |
| O(1)-Zn(1)-N(3)#1                                                                | 96.85(12)  | O(3)#2-Zn(1)-N(3)#1 | 121.52(13) |
| N(1)-Zn(1)-N(3)#1                                                                | 109.06(13) |                     |            |
| Symmetry codes: #1 = $x, 0.5-y, -0.5+z$ ; #2 = $0.5+x, 1.5-y, -z$ .              |            |                     |            |

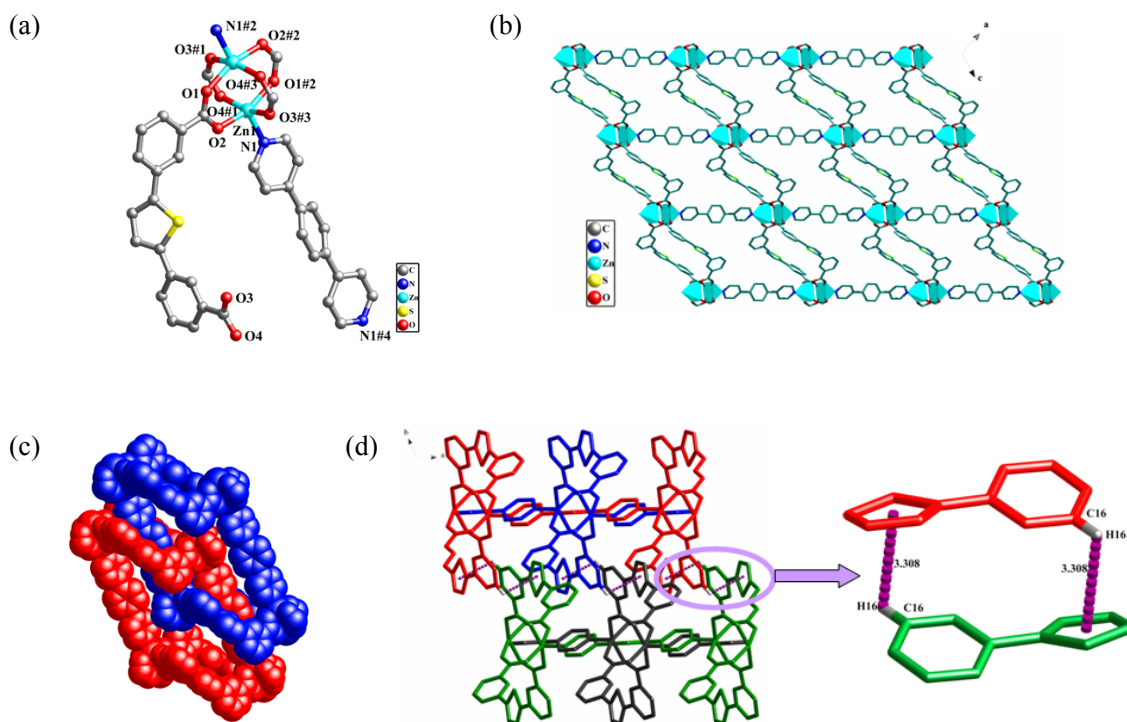

**Fig. S2** (a) Coordination environment of the Zn(II) cation in **MOF-1**. The hydrogen atoms are omitted for clarity. Symmetry codes: #1 =  $x, y, -1+z$ ; #2 =  $1-x, 1-y, -z$ ; #3 =  $1-x, 1-y, 1-z$ ; #4 =  $3-x, 1-y, 1-z$ . (b) The 2D network of **MOF-1**. (c) Schematic representation of rotaxane unit. (d) Schematic representation of the 3D framework of **MOF-1**. The C–H $\cdots$  $\pi$  interactions are shown with purple dash lines.

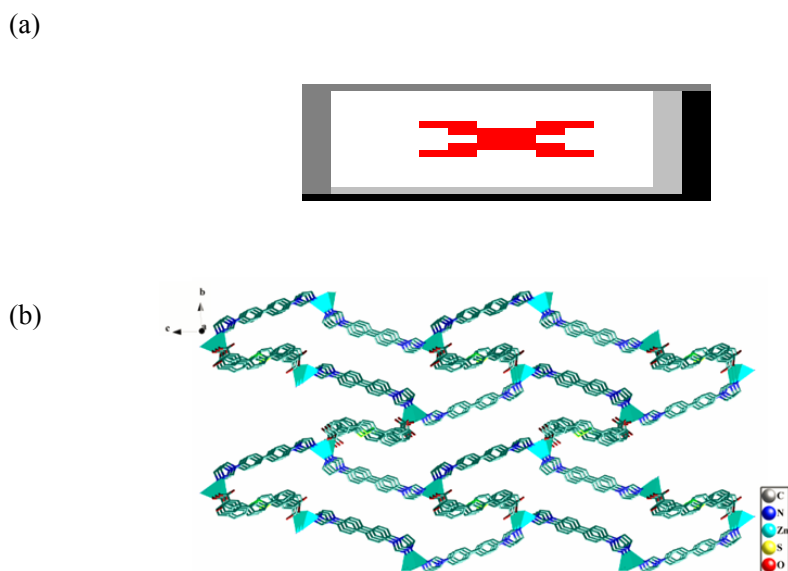

**Fig. S3** (a) Coordination environment of the Zn(II) cation in **MOF-2**. The hydrogen atoms are omitted for clarity. Symmetry codes: #1 =  $x, 0.5-y, -0.5+z$ ; #2 =  $0.5+x, 1.5-y, -z$ . (b) The 3D framework of **MOF-2**.

## S6. PXRD and thermal analysis

Powder X-ray diffractions (PXRD) experiments were carried out for **MOF-1** and **MOF-2** at room temperature to characterize their purity, as shown in Fig.s S2 (ESI†). The measured peak positions are in agreement with the simulated peak positions, indicating of pure products.

Furthermore, thermo gravimetric analysis (TGA) experiments were carried out to characterize the thermal stability of **MOF-1** and **MOF-2** (Fig. S3). For **MOF-1**, the framework exhibits a thermal stability up to 412 °C and then undergoes a continuous weight loss attributed to the decomposition of the organic ligands. For **MOF-2**, the first weight loss of 5.37% (calcd 5.07%) from room temperature to 232 °C corresponds to the loss of two lattice water molecules. The second weight loss from 322 to 631 °C can be ascribed to the departure of organic ligands. The final residue maybe ZnO (obsd, 11.86%; calcd, 11.46%).

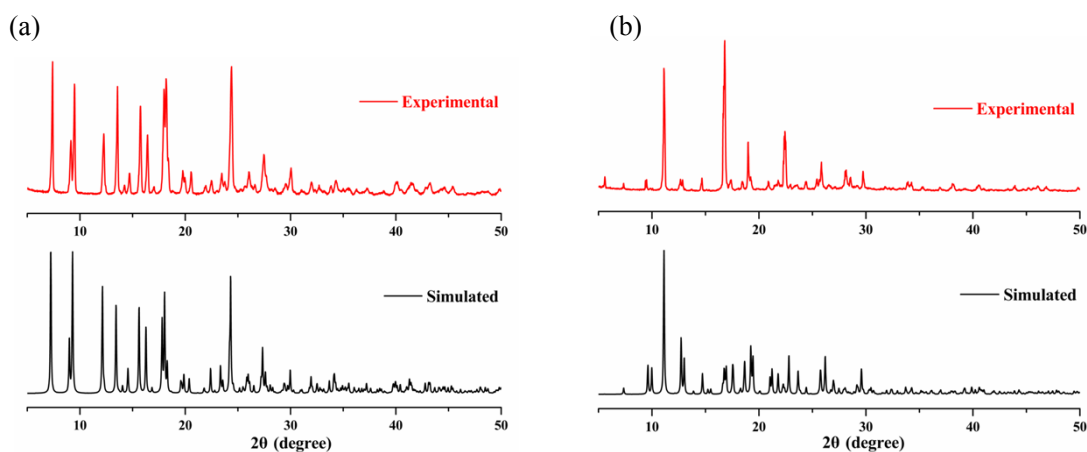

**Fig. S4** Powder X-ray diffraction patterns of **MOF-1** (a) and **MOF-2** (b).

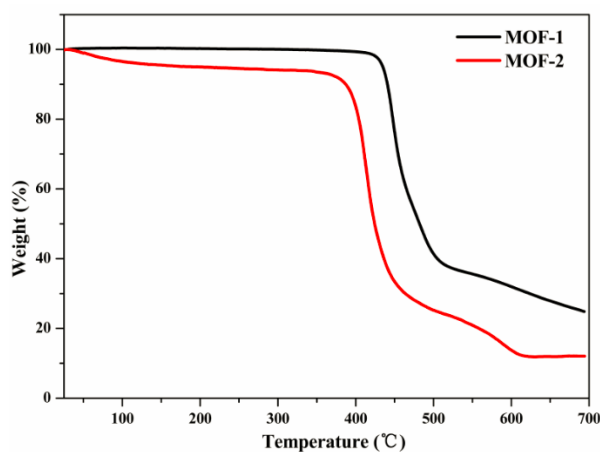

**Fig. S5.** TGA curves of **MOF-1** and **MOF-2**.



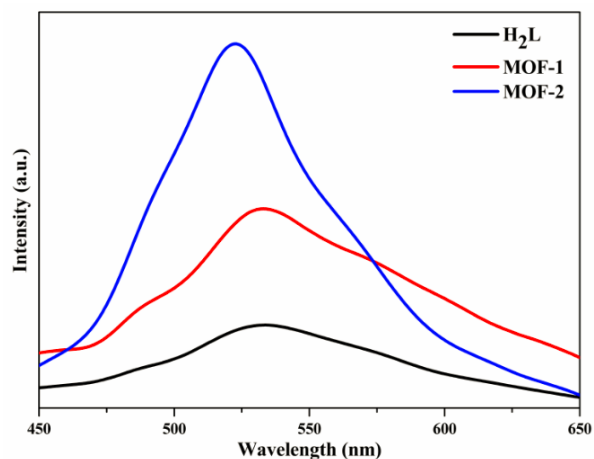

**Fig. S6** Solid-state photoluminescent spectra of **MOF-1**, **MOF-2** and free **H<sub>2</sub>L** ligand at room temperature when excited at 382 nm, respectively

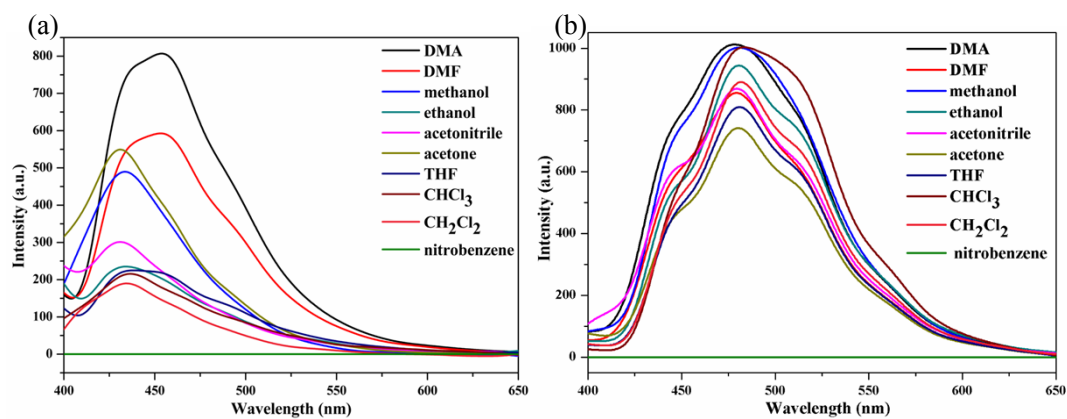

**Fig. S7** Photoluminescent spectra of **MOF-1** (a) and **MOF-2** (b) in different solvents when excited at 382 nm, respectively.

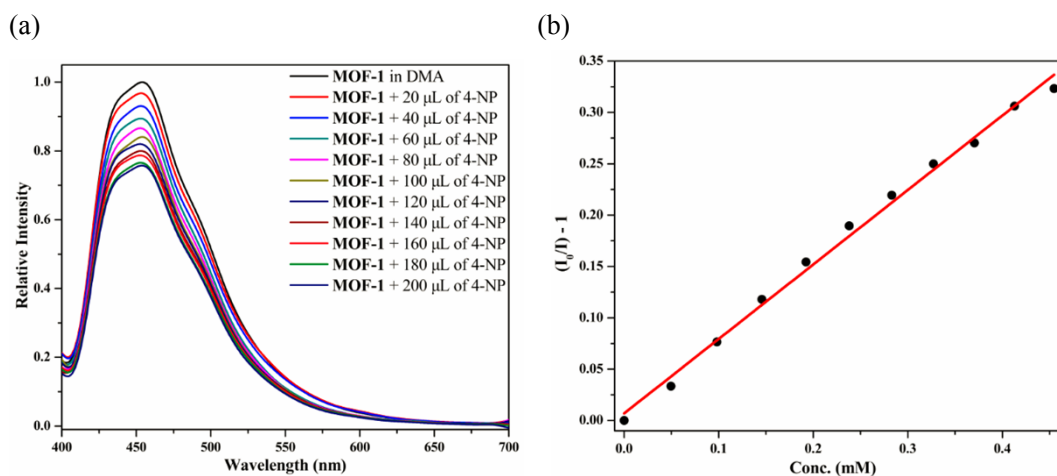

**Fig. S8** Photoluminescent spectra (a) and SV plot (b) of **MOF-1** by gradual addition of 5 mM 4-NP in DMA.

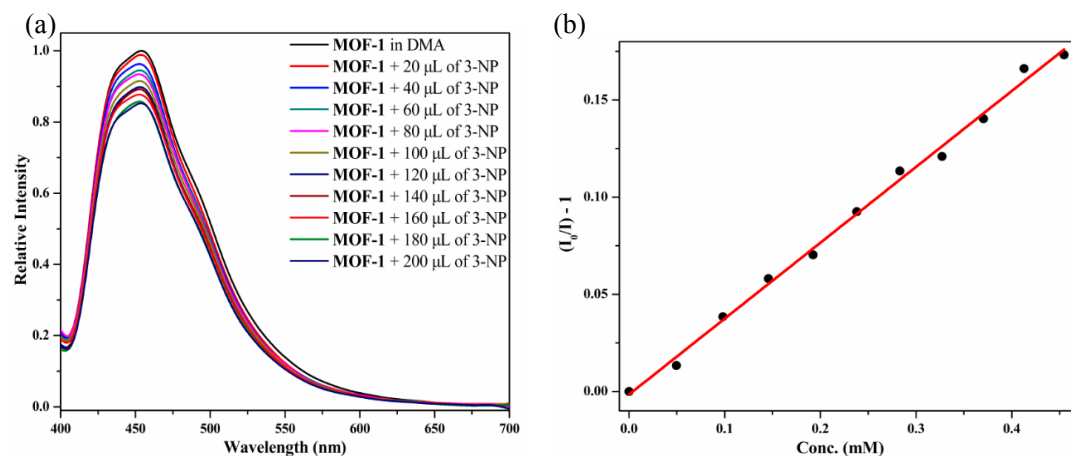

**Fig. S9** Photoluminescent spectra (a) and SV plot (b) of **MOF-1** by gradual addition of 5 mM 3-NP in DMA.

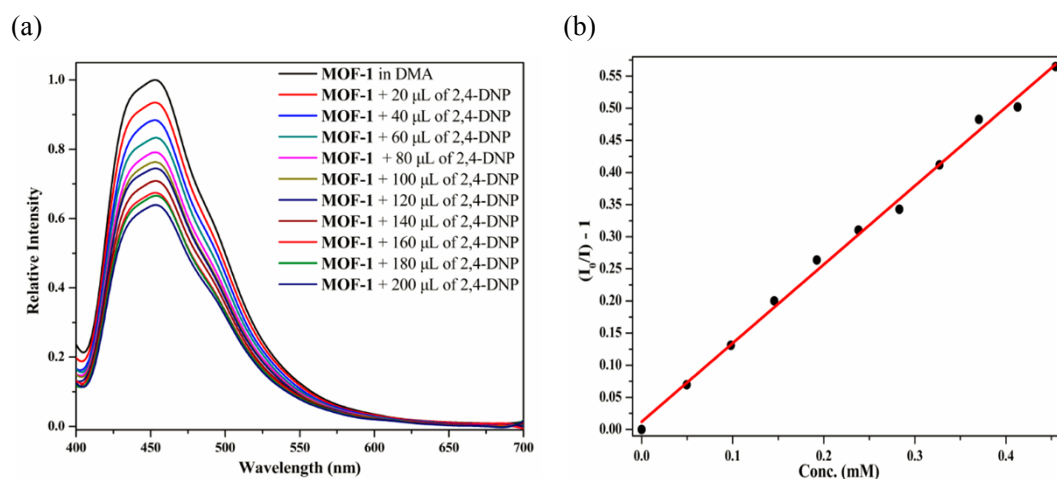

**Fig. S10** Photoluminescent spectra (a) and SV plot (b) of **MOF-1** by gradual addition of 5 mM 2,4-DNP in DMA.

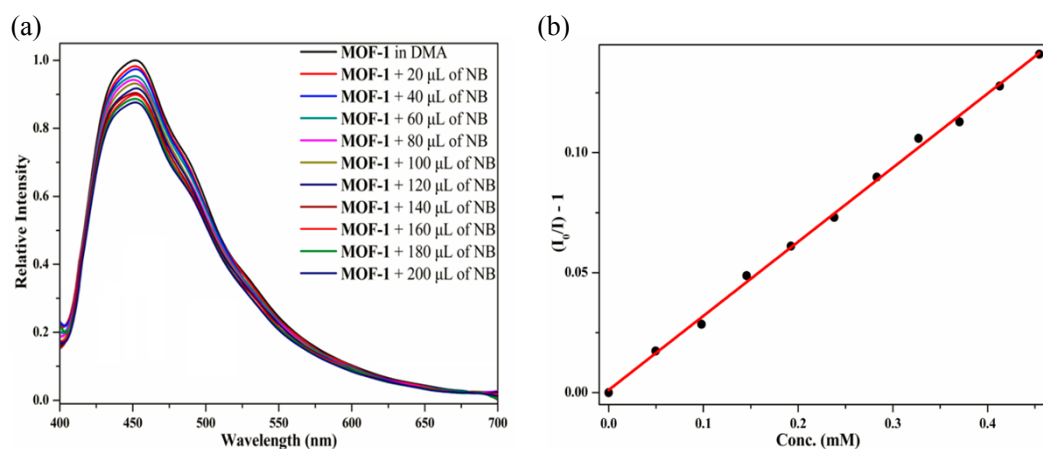

**Fig. S11** Photoluminescent spectra (a) and SV plot (b) of **MOF-1** by gradual addition of 5 mM NB in DMA.

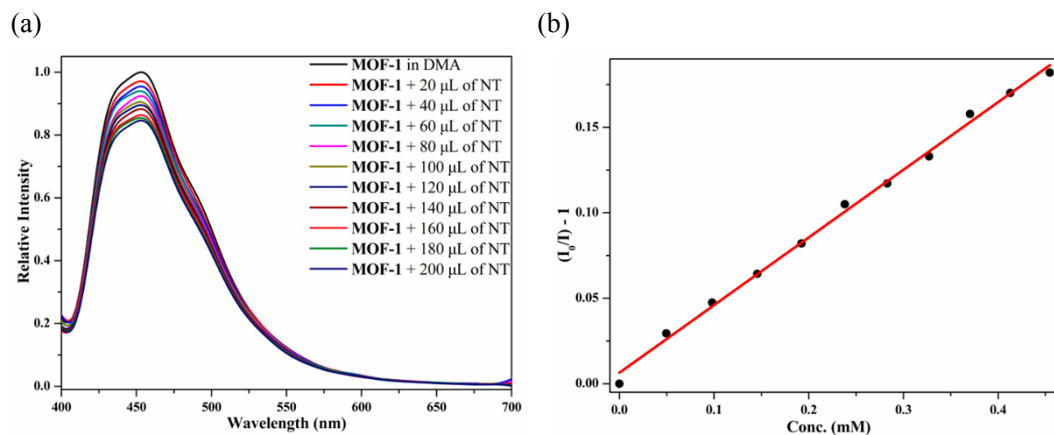

**Fig. S12** Photoluminescent spectra (a) and SV plot (b) of **MOF-1** by gradual addition of 5 mM NT in DMA.

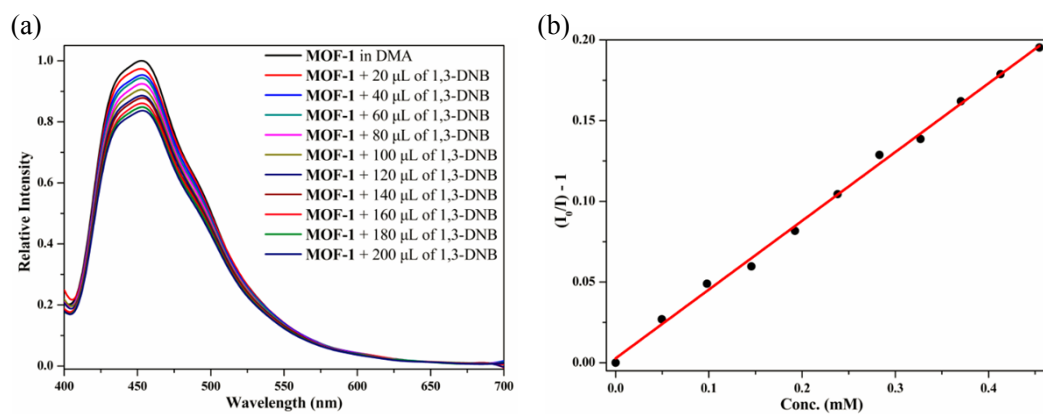

**Fig. S13** Photoluminescent spectra (a) and SV plot (b) of **MOF-1** by gradual addition of 5 mM 1,3-DNB in DMA.

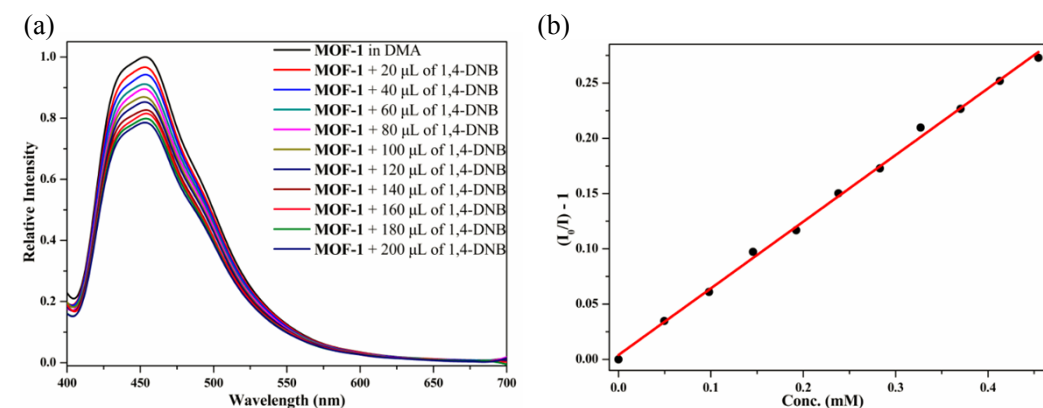

**Fig. S14** Photoluminescent spectra (a) and SV plot (b) of **MOF-1** by gradual addition of 5 mM 1,4-DNB in DMA.

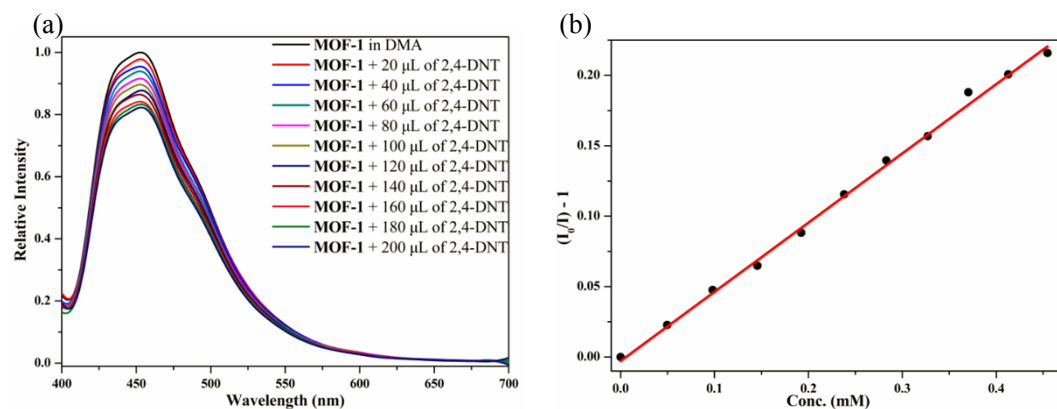

**Fig. S15** Photoluminescent spectra (a) and SV plot (b) of **MOF-1** by gradual addition of 5 mM 2,4-DNT in DMA.

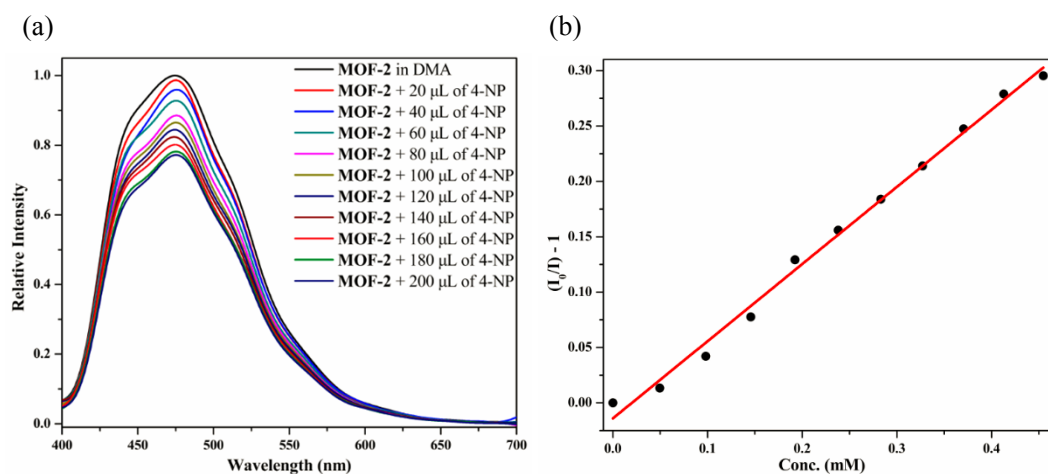

**Fig. S16** Photoluminescent spectra (a) and SV plot (b) of **MOF-2** by gradual addition of 5 mM 4-NP in DMA.

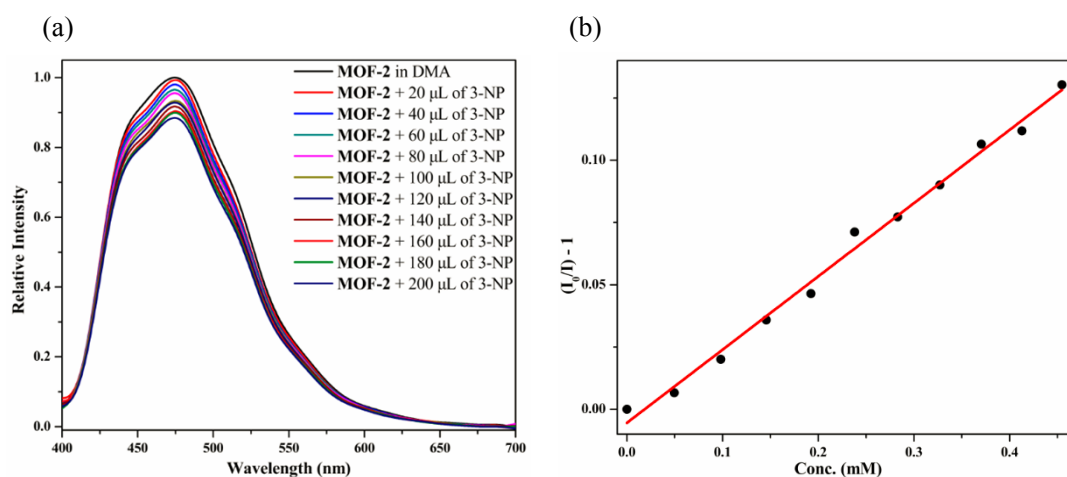

**Fig. S17** Photoluminescent spectra (a) and SV plot (b) of **MOF-2** by gradual addition of 5 mM 3-NP in DMA.

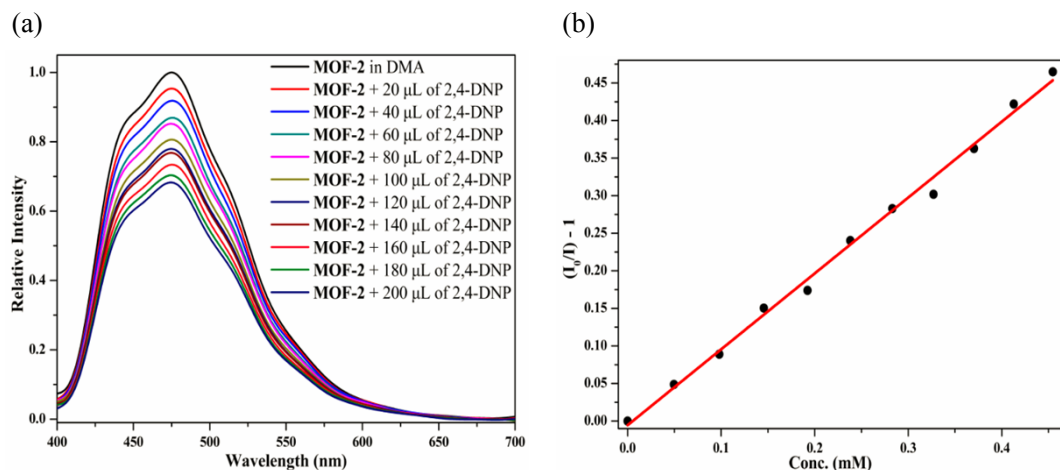

**Fig. S18** Photoluminescent spectra (a) and SV plot (b) of **MOF-2** by gradual addition of 5 mM 2,4-DNP in DMA.

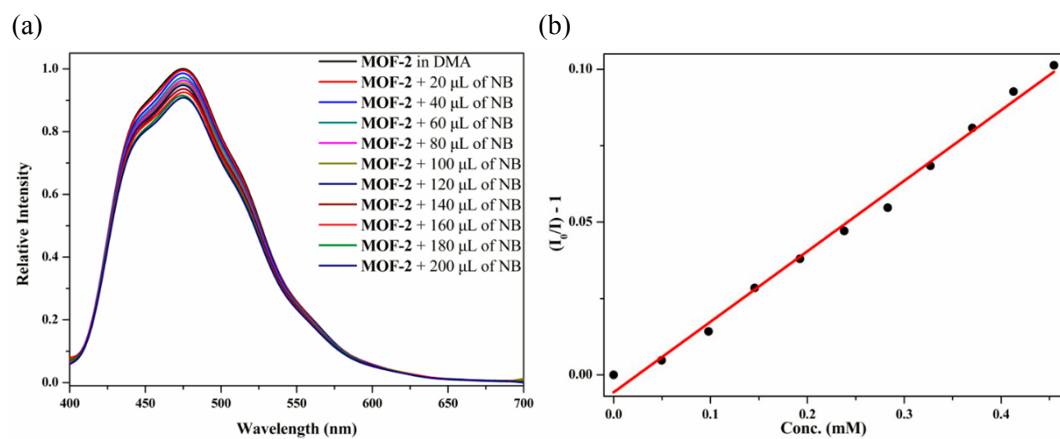

**Fig. S19** Photoluminescent spectra (a) and SV plot (b) of **MOF-2** by gradual addition of 5 mM NB in DMA.

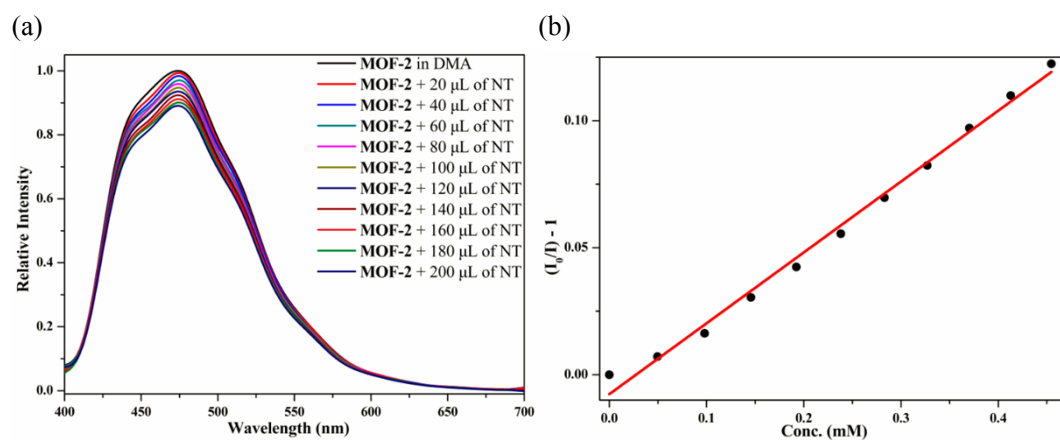

**Fig. S20** Photoluminescent spectra (a) and SV plot (b) of **MOF-2** by gradual addition of 5 mM NT in DMA.

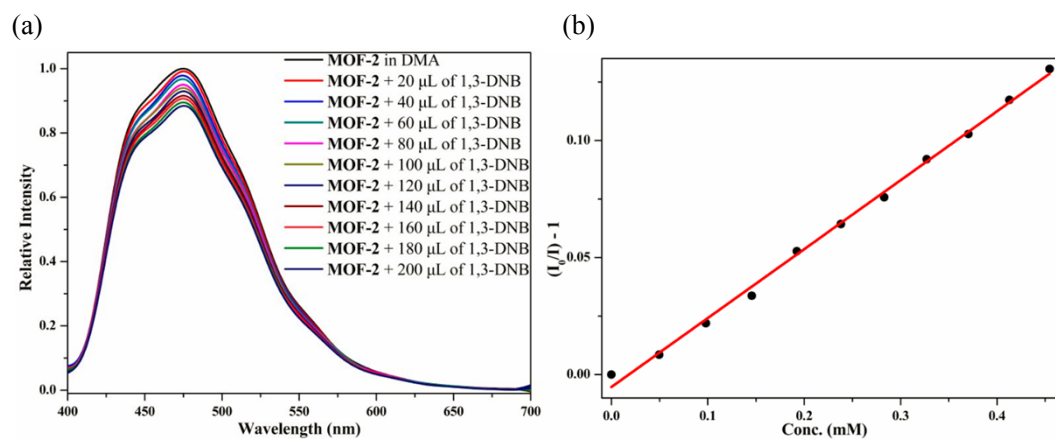

**Fig. S21** Photoluminescent spectra (a) and SV plot (b) of **MOF-2** by gradual addition of 5 mM 1,3-DNB in DMA.

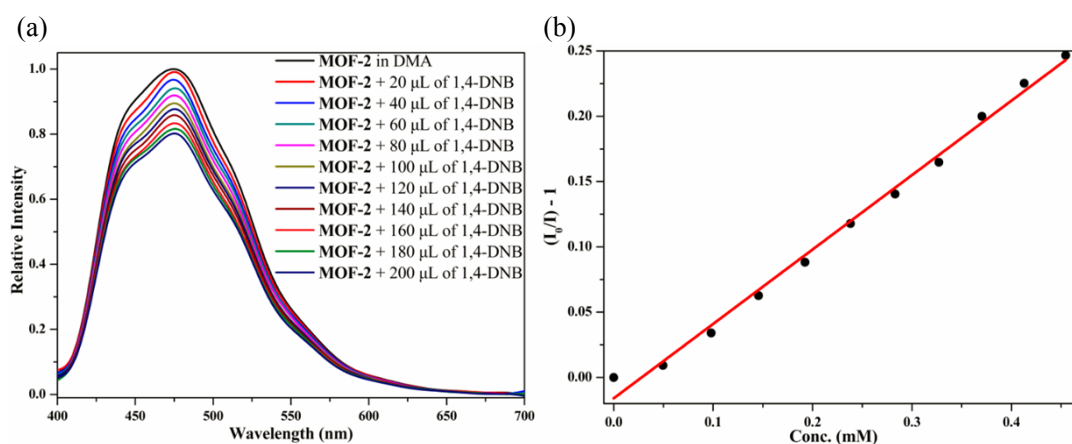

**Fig. S22** Photoluminescent spectra (a) and SV plot (b) of **MOF-2** by gradual addition of 5 mM 1,4-DNB in DMA.

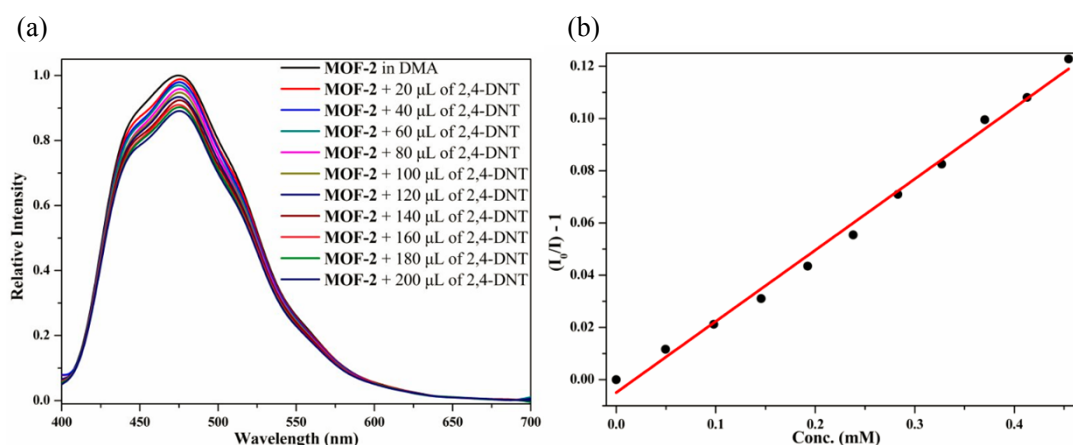

**Fig. S23** Photoluminescent spectra (a) and SV plot (b) of **MOF-2** by gradual addition of 5 mM 2,4-DNT in DMA.

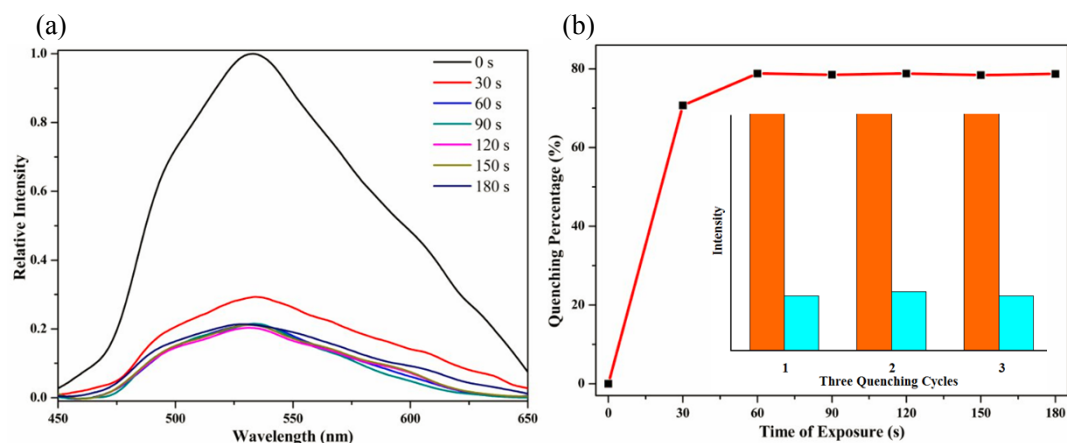

**Fig. S24** (a) Time-dependent emission spectra after exposure of **MOF-1** to the PA vapor. (b) Fluorescence quenching percentage as a function of time by PA vapour. Inset: the results for three continuous quenching cycles.

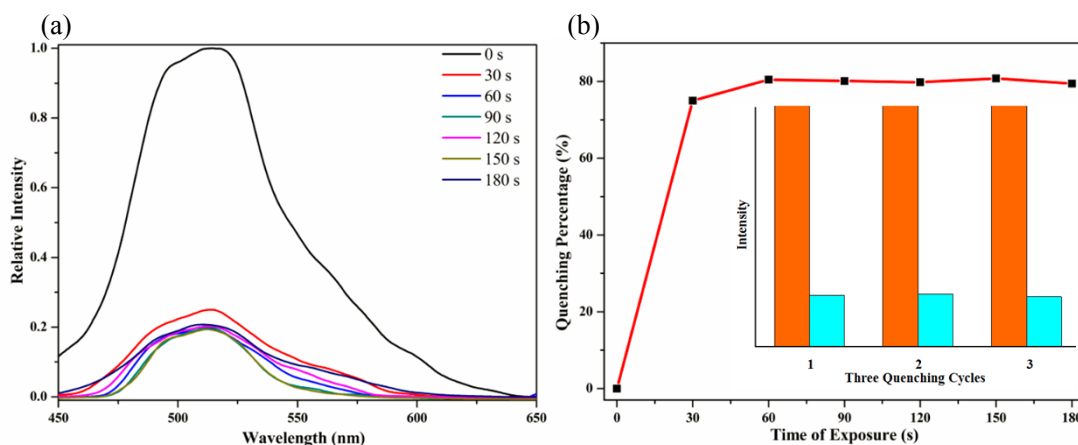

**Fig. S25** (a) Time-dependent emission spectra after exposure of **MOF-2** to the PA vapor. (b) Fluorescence quenching percentage as a function of time by PA vapour. Inset: the results for three continuous quenching cycles.

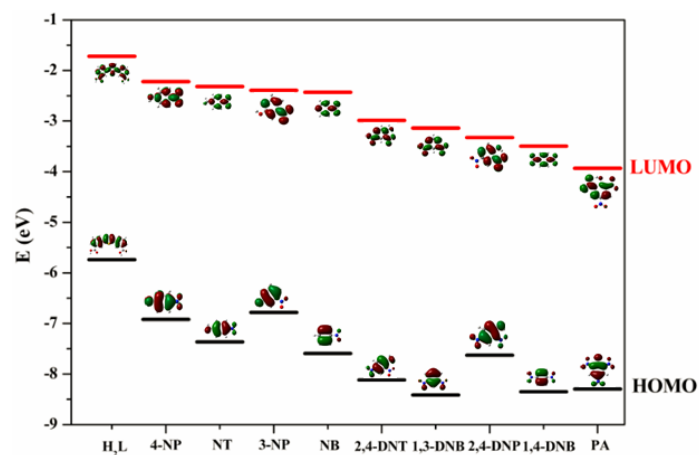

**Fig. S26** HOMO and LUMO of  $H_2L$  ligand and explosive analytes.

**Table S3.** Summary of quenching constants ( $K_{sv}$ ) for **MOF-1** and **MOF-2** for the sensing of explosive analytes at room temperature.

| Analytes | $K_{sv}$ (M <sup>-1</sup> ) |                    |
|----------|-----------------------------|--------------------|
|          | <b>MOF-1</b>                | <b>MOF-2</b>       |
| PA       | $2.40 \times 10^4$          | $2.46 \times 10^4$ |
| 2,4-DNP  | $1.22 \times 10^3$          | $1.01 \times 10^3$ |
| 4-NP     | $7.25 \times 10^2$          | $6.97 \times 10^2$ |
| NB       | $3.09 \times 10^2$          | $2.31 \times 10^2$ |
| NT       | $3.96 \times 10^2$          | $2.79 \times 10^2$ |
| 1,3-DNB  | $4.26 \times 10^2$          | $2.94 \times 10^2$ |
| 1,4-DNB  | $6.03 \times 10^2$          | $5.70 \times 10^2$ |
| 2,4-DNT  | $4.92 \times 10^2$          | $2.73 \times 10^2$ |
| 3-NP     | $3.91 \times 10^2$          | $2.94 \times 10^2$ |

**Table S4.** HOMO and LUMO energies calculated for H<sub>2</sub>L ligand and explosive analytes at B3LYP/6-31G\* level.

| Analytes         | HOMO (eV) | LUMO (eV) | Band gap (eV) |
|------------------|-----------|-----------|---------------|
| H <sub>2</sub> L | -5.7396   | -1.7187   | 4.0209        |
| 4-NP             | -6.9210   | -2.2210   | 4.7000        |
| NT               | -7.3646   | -2.3178   | 5.0468        |
| 3-NP             | -6.7814   | -2.3930   | 4.3884        |
| NB               | -7.5927   | -2.4294   | 5.1633        |
| 2,4-DNT          | -8.1181   | -2.9877   | 5.1304        |
| 1,3-DNB          | -8.4151   | -3.1376   | 5.2775        |
| 2,4-DNP          | -7.6284   | -3.3253   | 4.3031        |
| 1,4-DNB          | -8.3519   | -3.4964   | 4.8555        |
| PA               | -8.2976   | -3.9326   | 4.3650        |



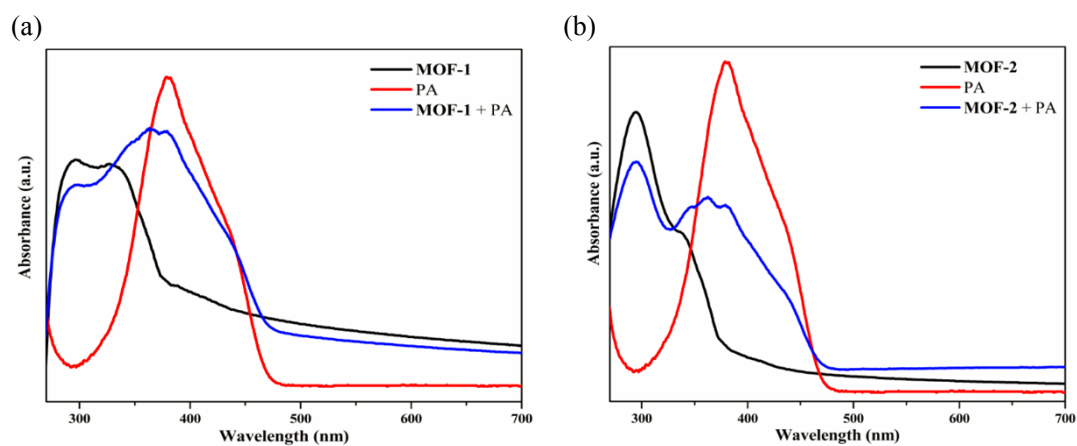

**Fig. S27** UV-Vis spectra of **MOF-1** (a) and **MOF-2** (b) in DMA and upon addition of PA.

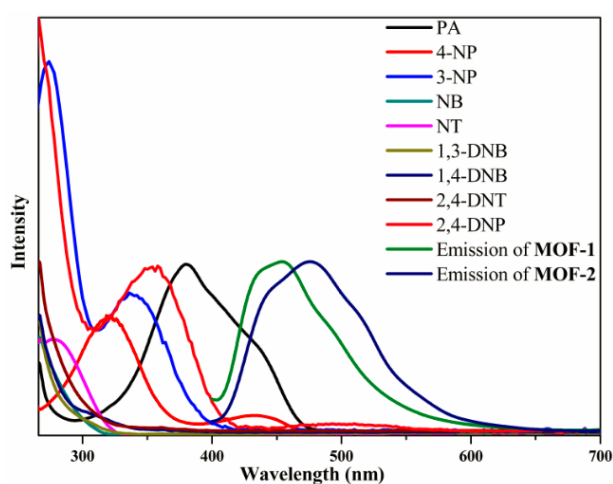

**Fig. S28** Spectral overlap between normalized absorbance spectra of explosive analytes and the normalized emission spectra of **MOF-1** and **MOF-2** in DMA.

## References

- 1 Bruker 2000, *SMART (Version 5.0)*, *SAINT-plus (Version 6)*, *SHELXTL (Version 6.1)*, and *SADABS (Version 2.03)*, Bruker AXS Inc., Madison, WI.
- 2 A. L. Spek, Platon Program, *Acta Crystallogr., Sect. A: Fundam. Crystallogr.*, 1990, **46**, 194.
- 3 V. A. Blatov, A. P. Shevchenko, V. N. Serezhkin, *J. Appl. Crystallogr.*, 2000, **33**, 1193.
